# Supplementary material
Source: publisher site journal article supplement (https://www.spandidos-publications.com/3983/downloadSupplementary)

Figure S1. Transfection efficiency of miR-134-3p inhibitor and sh-PITX2 in human breast cancer cells. miR-134-3p inhibitor and sh-PITX2 were transfected in SKBr-3 and MCF-7. Reverse transcription-quantitative PCR analysis of the expression levels of (A) miR-134-3p and (B) PITX2 in SKBr-3 and MCF-7 cells. \*\*\* $P < 0.001$  vs. NC inhibitor or sh-NC. Data are presented as the mean  $\pm$  SD.  $n=3$ . sh, short hairpin; PITX2, pituitary homeobox 2; miR, microRNA; NC, negative control.

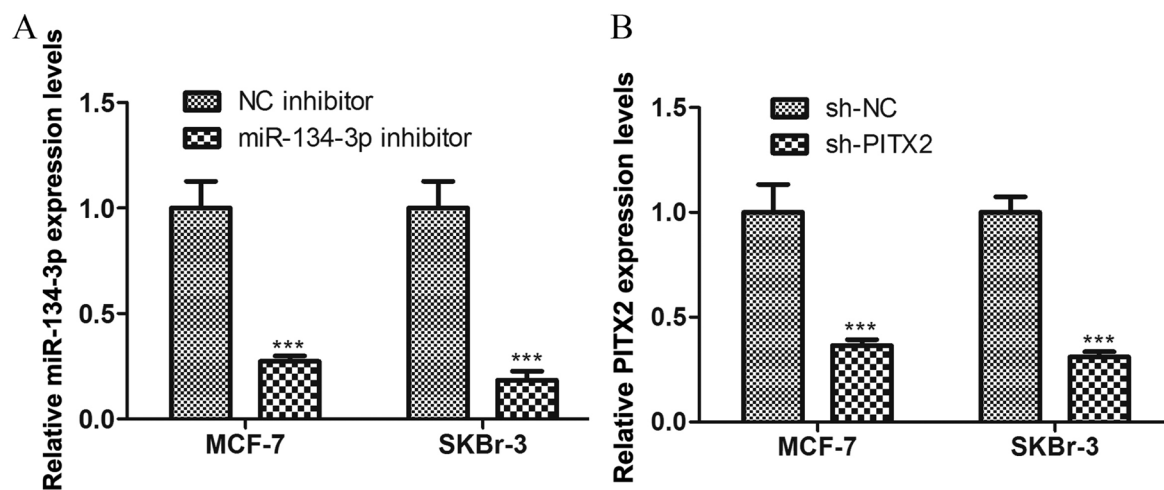

Supplement: Supplementary file 1 [file downloadSupplementary]
